# Supplementary material for: Consequences of Lmna Exon 4 Mutations in Myoblast Function
Source: Preprints.org preprint supplement (doi:10.20944/preprints202004.0232.v1), 2020-04-15
Supplement: Supplementary file 1 [file supplementary]

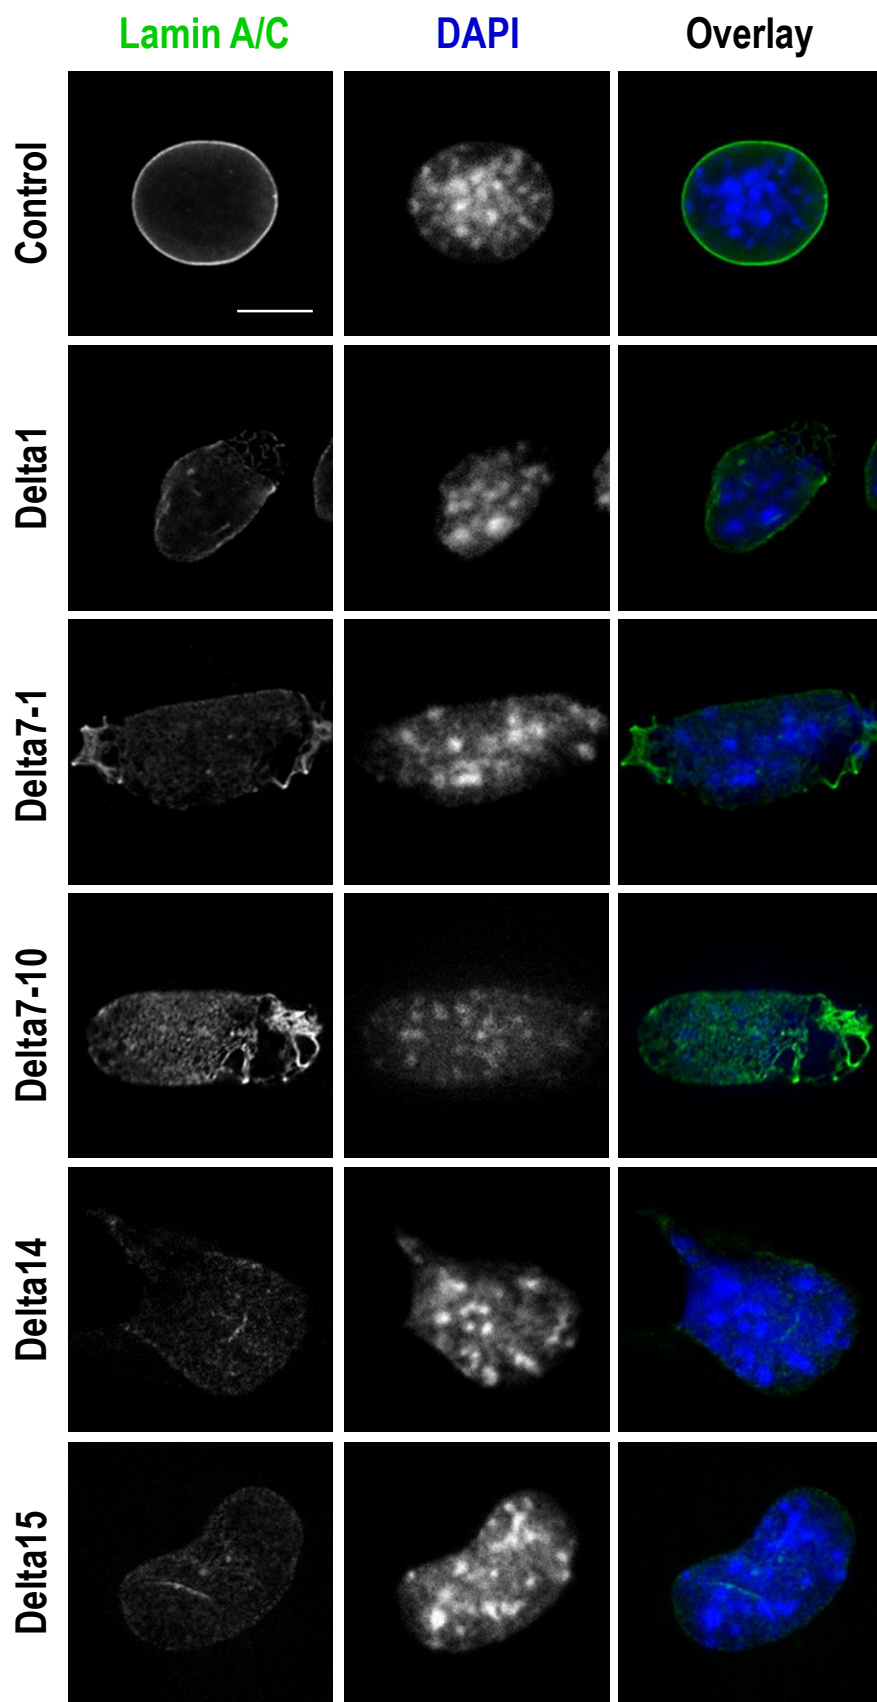

**Figure S4.** Lamin A-C subcellular localitacion and expression in Delta mutants. Cells were immunostained for LMNA/C (green) and nuclei was detected by DAPI staining (blue). Representative single confocal images from nuclei are shown for each Delta mutant. Scale bar = 8  $\mu$ m.
