# Supplementary material for: Consequences of Lmna Exon 4 Mutations in Myoblast Function
Source: Preprints.org preprint supplement (doi:10.20944/preprints202004.0232.v1), 2020-04-15
Supplement: Supplementary file 3 [file supplementary]

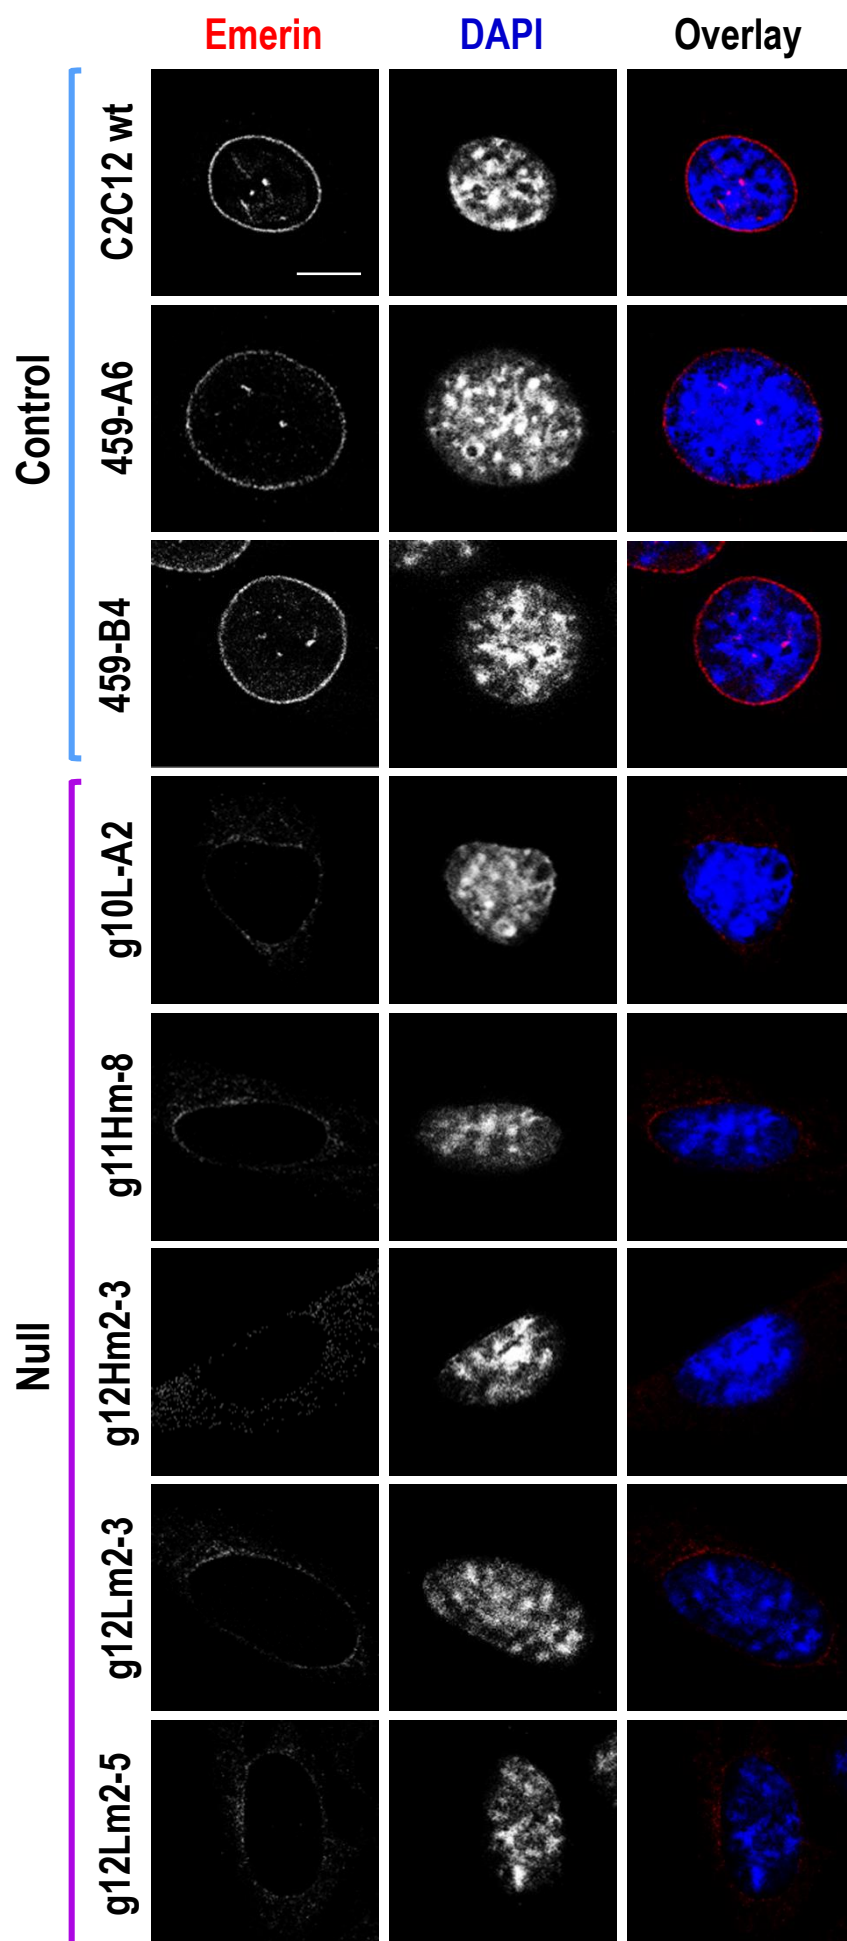

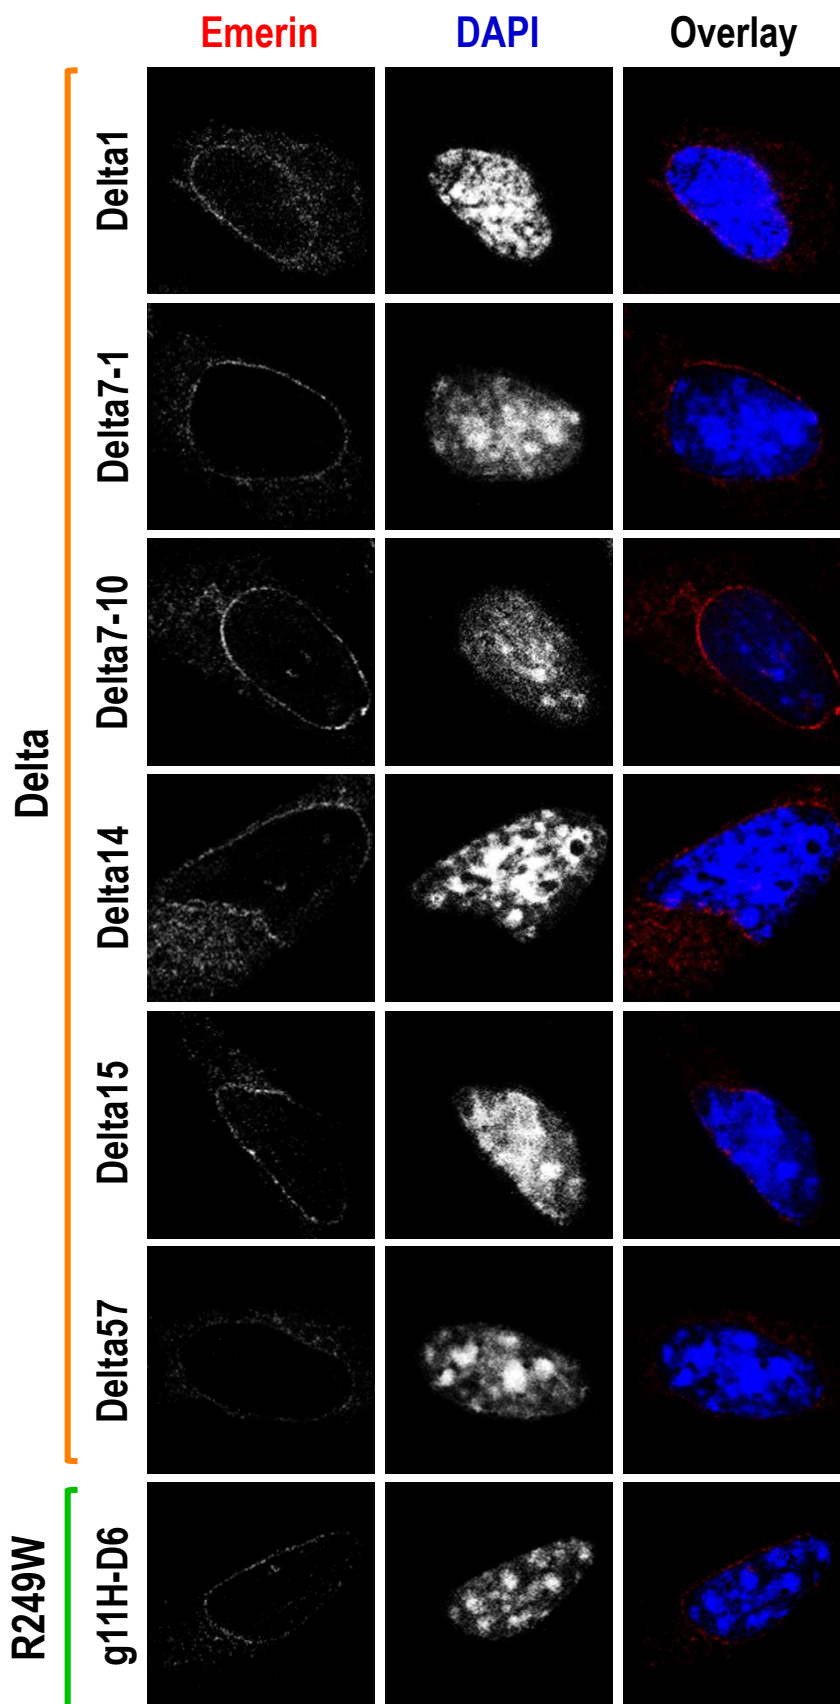

**Figure S6.** Emerin subcellular localization in *Lmna* exon 4 mutants. Representative single confocal images of the clones analyzed in this study showing Emerin detected by immunofluorescence. Scale bar = 8  $\mu$ m.
