# Supplementary material for: Consequences of Lmna Exon 4 Mutations in Myoblast Function
Source: Preprints.org preprint supplement (doi:10.20944/preprints202004.0232.v1), 2020-04-15
Supplement: Supplementary file 4 [file supplementary]

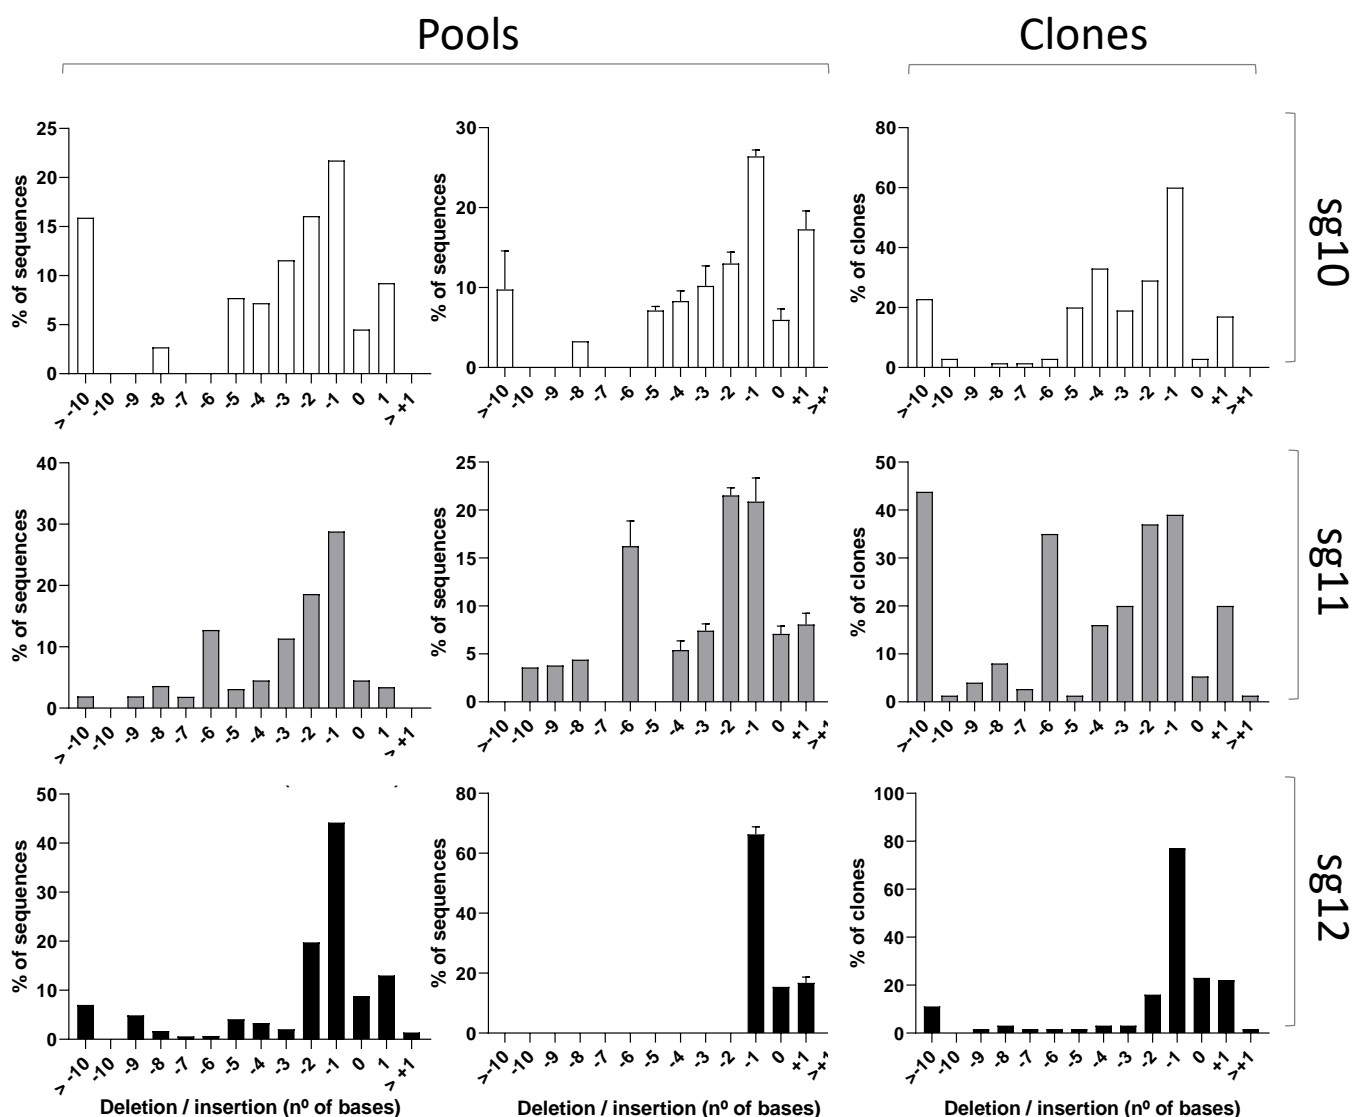

**Figure S3.** Deletions/insertions detected in C2C12 pools and clones. Graphs in left panels show the percentage of sequences with different changes in the number of bases detected by deep sequencing in pools transfected with Cas9 plus sg10 (upper graph), sg11 (middle graph) and sg12 (bottom graph). Second (pools) and third (clones) columns of graphs show the percentage of sequences or clones, respectively, with different changes detected by TIDE. In the second column, data represent the mean  $\pm$  standard errors of 6 pools per experiment.
