# Supplementary material for: Consequences of Lmna Exon 4 Mutations in Myoblast Function
Source: Preprints.org preprint supplement (doi:10.20944/preprints202004.0232.v1), 2020-04-15
Supplement: Supplementary file 5 [file supplementary]

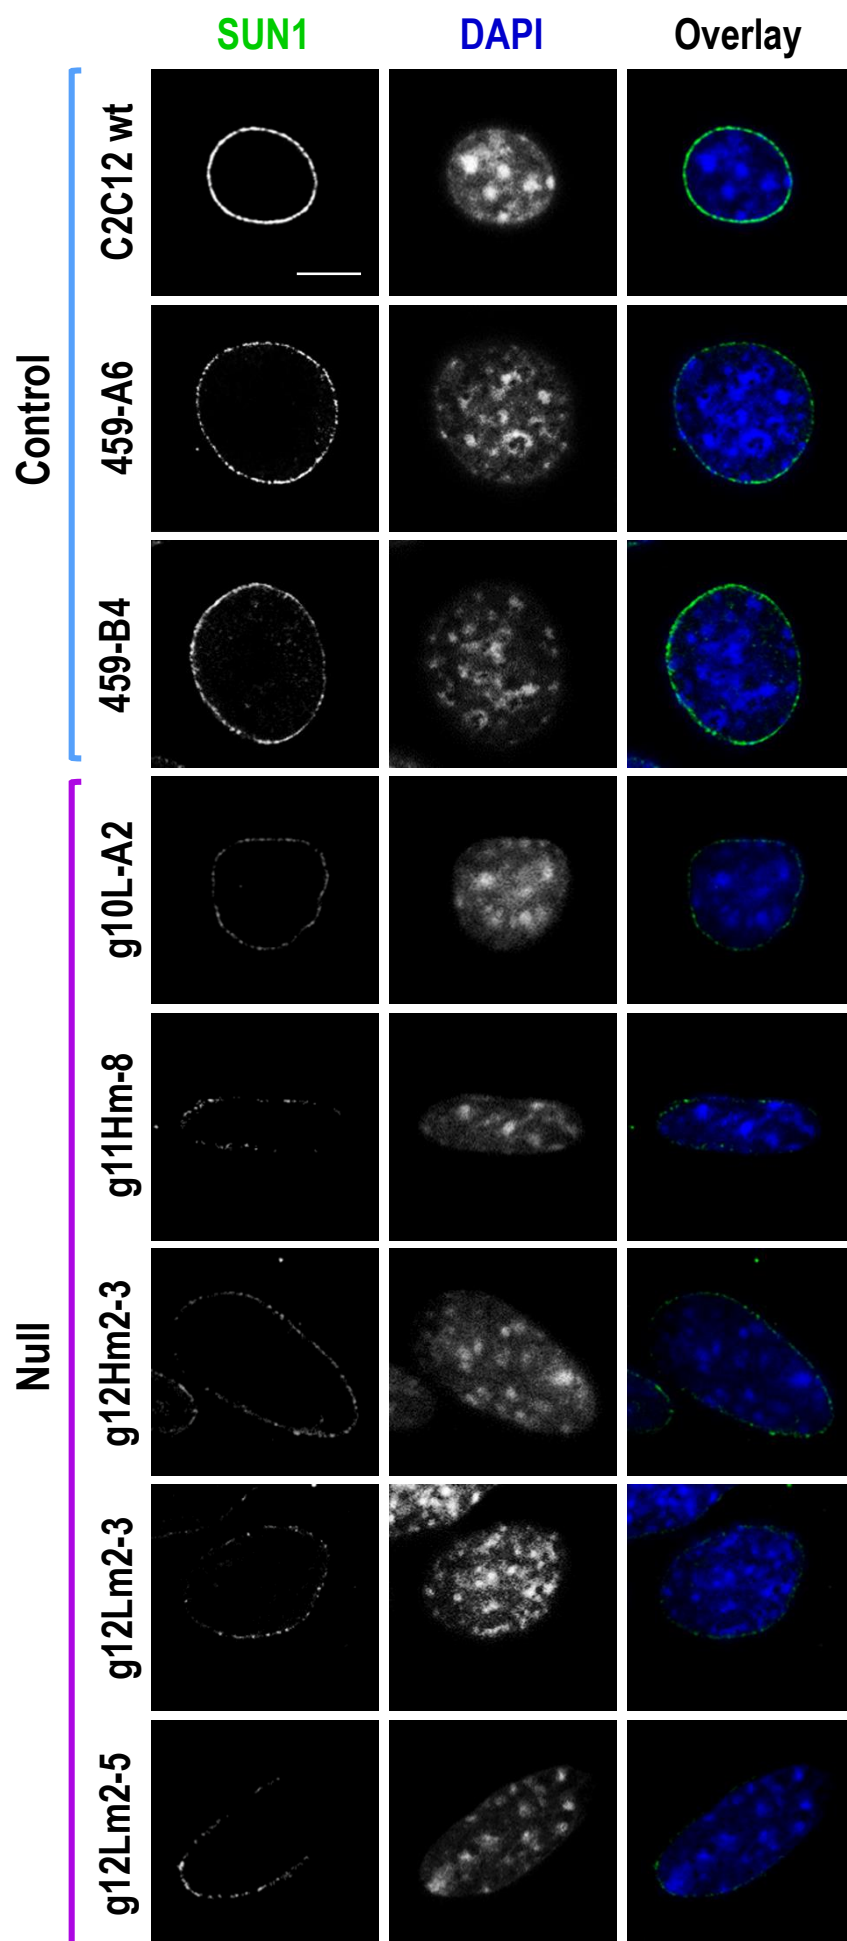

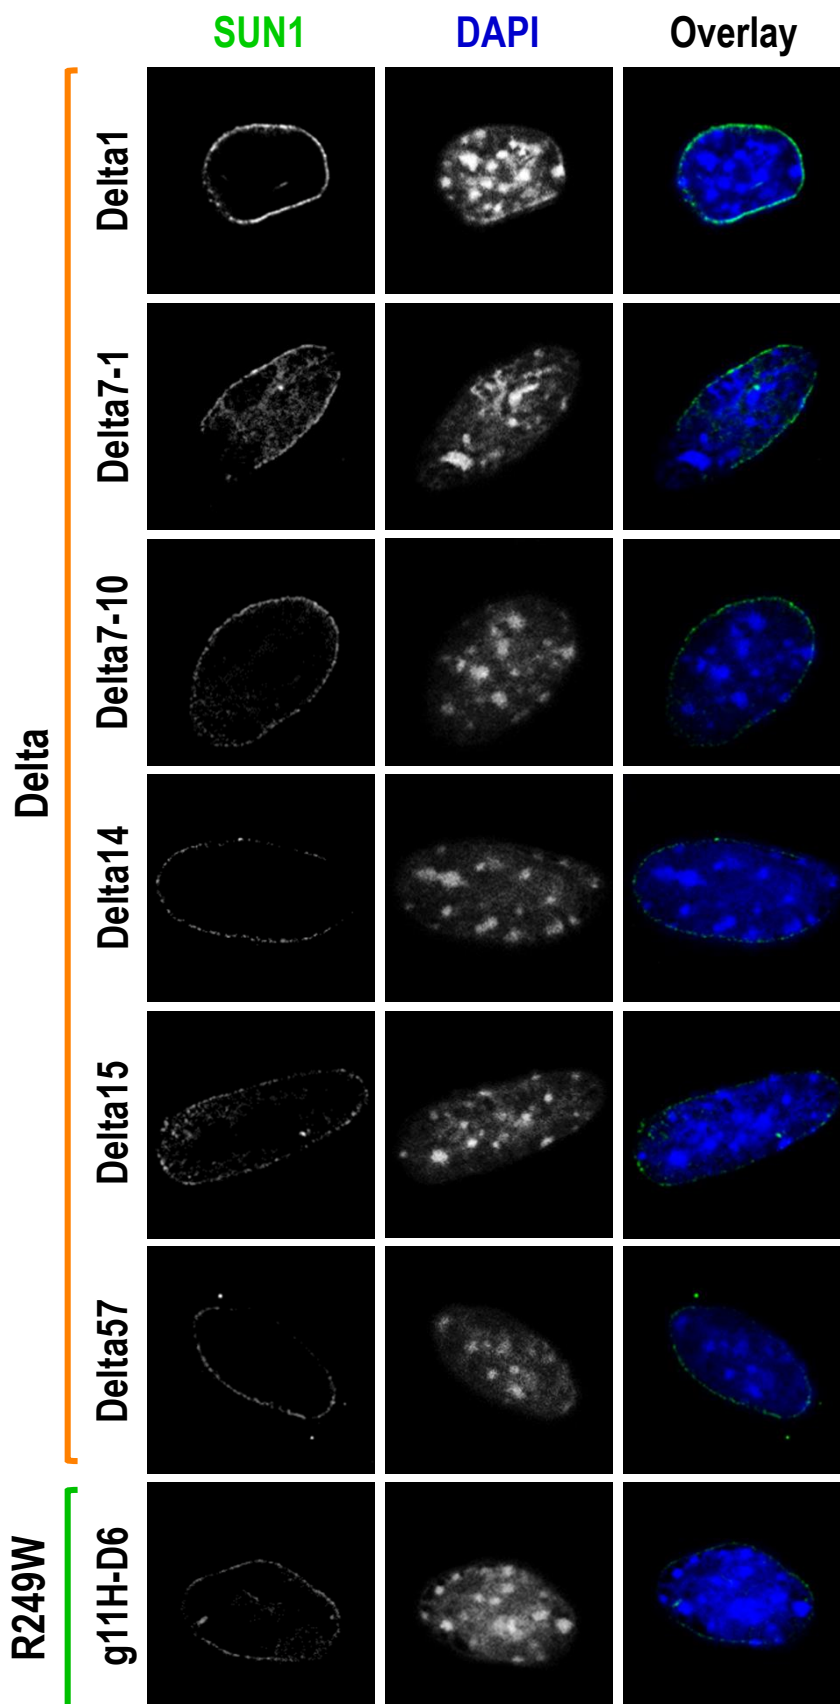

**Figure S7.** SUN1 sub-cellular localization in *Lmna* exon 4 mutants. Representative, single, confocal, images of SUN1 detected by immunostaining in Control, Null, Delta and R249W clones. Scale bar = 8  $\mu$ m.
