# Supplementary material for: Consequences of Lmna Exon 4 Mutations in Myoblast Function
Source: Preprints.org preprint supplement (doi:10.20944/preprints202004.0232.v1), 2020-04-15
Supplement: Supplementary file 6 [file supplementary]

**A**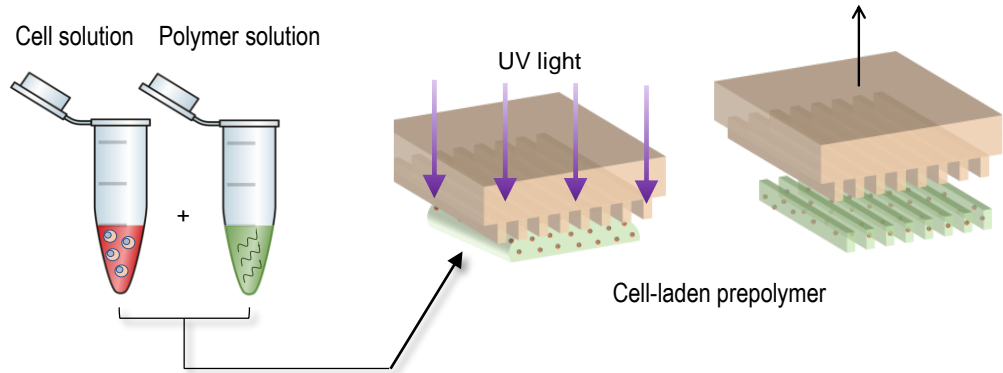**B**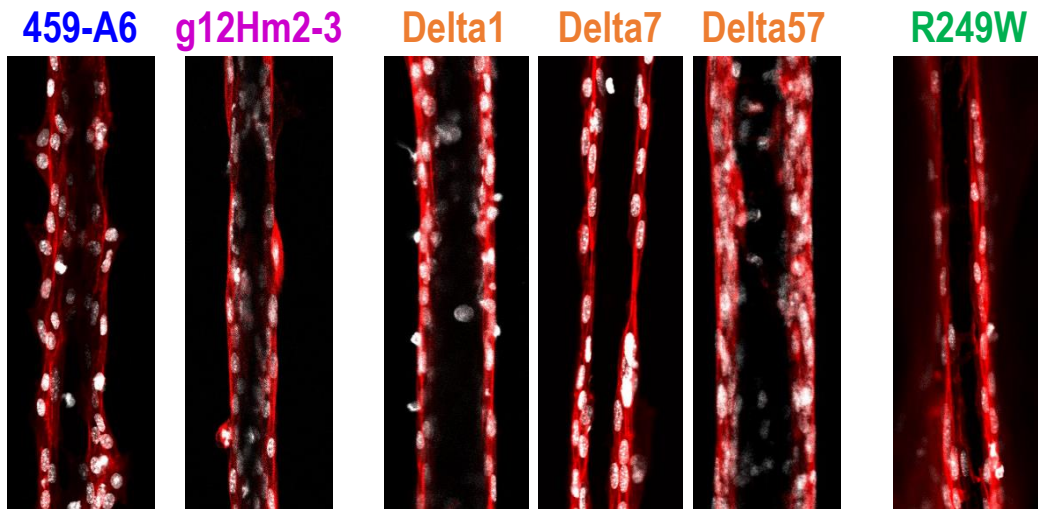

**Figure S2.** Generation of 3D skeletal muscle models. **(A)** Schematic view of the photo-mold patterning technique used to fabricate the in vitro 3D model. Cells were mixed with a photopolymerizable gelatin-based solution and, then, cell-laden solution was patterned by microscaled mold. A 3D patterned hydrogel was obtained, where cells are encapsulated, by polymerizing the hydrogel under UV light. **(B)** Images of the encapsulated clones in the 3D pattern at day 3, detected by phalloidin (red) and DAPI (grey) staining.
