# Supplementary material for: Consequences of Lmna Exon 4 Mutations in Myoblast Function
Source: Preprints.org preprint supplement (doi:10.20944/preprints202004.0232.v1), 2020-04-15
Supplement: Supplementary file 7 [file supplementary]

**A**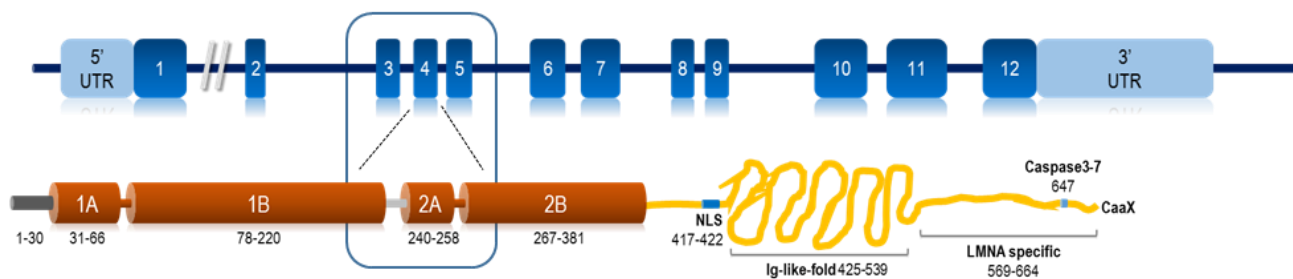**B**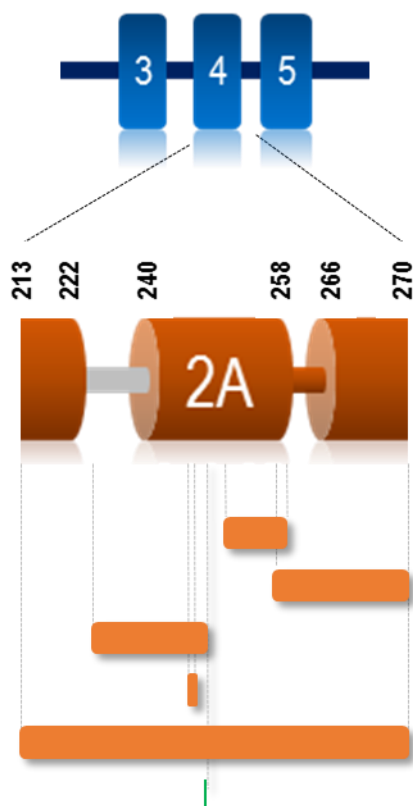

### Ex4 mutants

|                |                    |
|----------------|--------------------|
| <b>Delta7</b>  | p.His252_Gln258del |
| <b>Delta15</b> | p.Val256_Lys270del |
| <b>Delta14</b> | p.Glu236_Arg249del |
| <b>Delta1</b>  | p.Leu245del        |
| <b>Delta57</b> | p.Glu214_Lys270del |
| <b>R249W</b>   | p.Arg249Trp        |

**Figure S1.** Scheme of the *Lmna* gene and protein structure (A) and the mutants generated in this work (B).
