# Supplementary material for: Consequences of Lmna Exon 4 Mutations in Myoblast Function
Source: Preprints.org preprint supplement (doi:10.20944/preprints202004.0232.v1), 2020-04-15
Supplement: Supplementary file 8 [file supplementary › Table S1.xlsx]

## Sheet: Info for tables
Legend
(1) Letter identifying cell line-experiment-sg-template-clone/pool
(2) 1: done; 0: pending
(3) % from TIDE analysis
(4) No changes (%); Ins (number of bases and %); Del (number of bases and %)
	White --> TIDE analysis p<0.001
	Blue--> TIDE analysis p≥0.001

## Sheet: Summary of pools
ID (1)	Cell type/Experiment ID	Sequencing of 1st PCR (2)	% CRISPR Activity (3)	TIDE analysis (4)	-38	-37	-36	-35	-34	-33	-32	-31	-30	-29	-28	-27	-26	-25	-24	-23	-22	-21	-20	-19	-18	-17	-16	-15	-14	-13	-12	-11	-10	-9	-8	-7	-6	-5	-4	-3	-2	-1	0	1	2	3	4	5	6
C2-004-g10L	C2C12, exp004, g10, 30pmol ssODN10, pool	1	92.4	6,2% -5 nt; 9,5% -4 nt; 9,5% -3 nt; 10,9% -2 nt; 23,4% -1 nt; 24,7% +1 nt				0.3	0.4	0.5	1.3	0.1		0.1								0.2	0.1			0.4			0.1		0.1		1.7		1.5		0.1	6.2	9.5	9.5	10.9	23.4	2.9	24.7
C2-004-g10H	C2C12, exp004, g10, 300pmol ssODN10, pool	1	90	7,8% -5 nt; 13,7% -4 nt; 20,6% -3 nt; 18,7% -2 nt; 29,5% -1 nt; 3,7% 0 nt							0.2																											7.8	13.7	20.6	18.7	29.5	3.7	2.1
C2-004-g11L	C2C12, exp004, g11, 30pmol ssODN11, pool	1	87.3	3,6% -10 nt; 13,0% -6 nt; 6,9% -4 nt; 7,9% -3 nt; 21,7% -2 nt; 15,95 -1 nt; 9,3% 0 nt; 12,2% +1 nt																							2					1	3.6	2	0.6	0.3	13	0.1	6.9	7.9	21.7	15.9	9.3	12.2
C2-004-g11H	C2C12, exp004, g11, 300pmol ssODN11, pool	1	88.9	3,8% -9 nt; 4,4% -8 nt; 13,9% -6 nt; 10,8% -3 nt; 19,15 -2 nt; 28,3% -1 nt; 7,6% 0 nt; 5,5% +1 nt								0.1																				0.1		3.8	4.4		13.9	1	1.9	10.8	19.1	28.3	7.6	5.5
C2-004-g12L	C2C12, exp004, g12, 30pmol ssODN12, pool	1	94.5	68,4% -1 nt; 11,0% +1 nt																									1.4	0.3	0.6			1	3.9			2.9			3.9	68.4	4.2	11
C2-004-g12H	C2C12, exp004, g12, 300pmol ssODN12, pool	1	94.5	66,9% -1 nt; 23,3% +1 nt																									1.7	0.4	1.8											66.9	3.6	23.3		0.2
C2-005-g10Lmut	C2C12, exp005, g10, 30pmol ssODN10, PAM mutated, pool	1	85.8	8,7% -5 nt; 6,0% -4 nt; 7,9% -3 nt; 15,6% -2 nt; 26,9% -1 nt; 8,9% 0 nt; 12,4% +1 nt	0.2		0.1	0.3			0.9	0.2							0.2									1	0.4		0.5	2.7			1.3		0.3	8.7	6	7.9	15.6	26.9	8.9	12.4
C2-005-g10Lmut2	C2C12, exp005, g10, 30pmol ssODN10, PAM+guide mutated, pool	1	86.7	4,9% -11 nt; 7,8% -5 nt; 4,9% -4 nt; 5,6% -3 nt; 13,0% -2 nt; 26,8% -1 nt; 7,7% 0 nt; 14,3% +1 nt		0.3	0.8			0.2	0.1	0.5	0.4	0.9	0.9	1.3													1.9		0.8	4.9	0.2		1			7.8	4.9	5.6	13	26.8	7.7	14.3
C2-005-g10Hmut	C2C12, exp005, g10, 300pmol ssODN10, PAM mutated, pool	1	93.2	6,9% -5 nt; 7,6% -4 nt; 13,8% -3 nt; 9,7% -2 nt; 26,5% -1 nt; 20,5% +1 nt					0.3	2.3	0.2				1											0.9			0.7			2.1					0.7	6.9	7.6	13.8	9.7	26.5	2	20.5
C2-005-g10Hmut2	C2C12, exp005, g10, 300pmol ssODN10, PAM+guide mutated, pool	1	91.1	7,5% -12 nt; 7,1% -11 nt; 3,3% -8 nt; 5,5% -5 nt; 8,2% -4 nt; 3,9% -3 nt; 10,1% -2 nt; 25,3% -1 nt; 3,5% 0 nt; 14,5% +1 nt											0.1							1		0.3					3.1		7.5	7.1			3.3		1.2	5.5	8.2	3.9	10.1	25.3	3.5	14.5		1
C2-005-g11Lmut	C2C12, exp005, g11, 30pmol ssODN11, PAM mutated, pool	1	89.7	13,4% -6 nt; 3,5% -4 nt; 6,4% -3 nt; 24,7% -2 nt; 23,0% -1 nt; 7,1% 0 nt; 6,75% +1 nt								0.7				0.9						0.1								0.7		0.3	0.2	2.3	1.7	3	13.4	1.6	3.5	6.4	24.7	23	7.1	6.7	0.4
C2-005-g11Lmut2	C2C12, exp005, g11, 30pmol ssODN11, PAM+guide mutated, pool	1	86.6	14,1% -6 nt; 3,5% -4 nt; 6,7% -3 nt; 22,5% -2 nt; 21,9% -1 nt; 8,9% 0 nt; 7,25% +1 nt								1.2				0.3											0.3	0.7				0.7		1.7	1.5	2.2	14.1	1.9	3.5	6.7	22.5	21.9	8.9	7.2
C2-005-g11Hmut	C2C12, exp005, g11, 300pmol ssODN11, PAM mutated, pool	1	91.9	13,6% -6 nt; 4,8% -4 nt; 6,7% -3 nt; 20,15 -2 nt; 24,5% -1 nt; 4,0% 0 nt; 8,8% -1 nt								0.3	0.7			0.1										2		0.6	0.8		0.2	0.7	0.4	2	3	1.6	13.6	0.9	4.8	6.7	20.1	24.5	4	8.8
C2-005-g11Hmut2	C2C12, exp005, g11, 300pmol ssODN11, PAM+guide mutated, pool	1	89.7	29,4% -6 nt; 8,3% -4 nt; 6,0% -3 nt; 21,1% -2 nt; 11,7% -1 nt; 5,6% 0 nt								0.9															0.4	1.1		0.9			0.2	0.4	1.9	2	29.4	3.4	8.3	6	21.1	11.7	5.6	2
C2-005-g12Lmut	C2C12, exp005, g12, 30pmol ssODN12, PAM mutated, pool	1	96.7	67,0% -1 nt; 20,3% +1 nt																											1.7				1.6		1	0.5	0.5	0.3	3.4	67	2.4	20.3	0.6
C2-005-g12Lmut2	C2C12, exp005, g12, 30pmol ssODN12, PAM+guide mutated, pool	1	96.6	67,2% -1 nt; 18,0% +1 nt																											0.5			5	1.8	0.3			1	0.7	1.6	67.2	2.5	18
C2-005-g12Hmut	C2C12, exp005, g12, 300pmol ssODN12, PAM mutated, pool	1	96.4	73,5% -1 nt; 15,5% +1 nt																											0.9				1.8	0.7				0.6	1.6	73.5	2.7	15.5			1
C2-005-g12Hmut2	C2C12, exp005, g12, 300pmol ssODN12, PAM+guide mutated, pool	1	83.3	54,6% -1 nt; 15,4% 0 nt; 12,4% +1 nt																											1.3			0.6	3.7	1.3		3.4	3.4		0.2	54.6	15.4	12.4
		3.02104	89.8667	sg10	0.2	0.3	0.45	0.3	0.35	1	0.54	0.266667	0.4	0.5	0.666667	1.3			0.2			0.6	0.1	0.3		0.65		1	1.24		2.225	4.2	0.95		1.775		0.575	7.15	8.31667	10.2167	13	26.4	4.78333	14.75		1
		1.89991	89.0167	sg11								0.64	0.7			0.433333						0.1				2	0.9	0.8	0.8	0.8	0.2	0.56	1.1	2.03333	2.18333	1.82	16.2333	1.48333	4.81667	7.41667	21.5333	20.8833	7.08333	7.06667	0.4
		5.17945	93.6667	sg12																									1.55	0.35	0.566667			2.2	2.56	0.766667	1	2.26667	1.63333	0.533333	2.14	66.2667	5.13333	16.75	0.6	0.2	1
[truncated: 32 more columns]

## Sheet: Graphs of pools
Deep sequencing analysis
			sg10 pool						sg11 pool							sg12 pool
TIDE analysis
Extended data
Significant data

## Sheet: Summary of clones
ID (1)	Cell type/Experiment ID	% CRISPR Activity (3)	TIDE analysis (4)	-50	-49	-48	-47	-46	-45	-44	-43	-42	-41	-40	-39	-38	-37	-36	-35	-34	-33	-32	-31	-30	-29	-28	-27	-26	-25	-24	-23	-22	-21	-20	-19	-18	-17	-16	-15	-14	-13	-12	-11	-10	-9	-8	-7	-6	-5
C2-004-g10L-A1	C2C12, exp004, g10, 30pmol ssODN10, clone A1	70	40,3% -3 nt
C2-004-g10L-A2	C2C12, exp004, g10, 30pmol ssODN10, clone A2	99.2	96,9% -2 nt
C2-004-g10L-A3	C2C12, exp004, g10, 30pmol ssODN10, clone A3	96.3	48,3% -5 nt; 25,5% -1 nt; 24,6% +1 nt																																														48.3
C2-004-g10L-A5	C2C12, exp004, g10, 30pmol ssODN10, clone A5	92.6	78,9% -12 nt																																							78.9
C2-004-g10L-B1	C2C12, exp004, g10, 30pmol ssODN10, clone B1	93.1	41,7% -8 nt; 43,5% -2 nt																																											41.7
C2-004-g10L-B2	C2C12, exp004, g10, 30pmol ssODN10, clone B2	96.5	48,6% -4 nt; 46,2% +1 nt
C2-004-g10L-B3	C2C12, exp004, g10, 30pmol ssODN10, clone B3	97.7	49,4% -21 nt; 46,9% -5 nt																														49.4																46.9
C2-004-g10L-B4	C2C12, exp004, g10, 30pmol ssODN10, clone B4	93	36,2% -7 nt; 33,9% +1 nt; 17,5% +49 nt																																												36.2
C2-004-g10L-B5	C2C12, exp004, g10, 30pmol ssODN10, clone B5	94.8	49,2% -20 nt; 40,5% -5 nt																															49.2															40.5
C2-004-g10L-B6	C2C12, exp004, g10, 30pmol ssODN10, clone B6	95.2	14,8% -20 nt; 21,0% -6 nt; 16,3% -5 nt; 20,1% -1 nt; 23,0% +1 nt																															14.8														21	16.3
C2-004-g10L-C1	C2C12, exp004, g10, 30pmol ssODN10, clone C1	99.1	95,3% -12 nt																																							95.3
C2-004-g10L-C2	C2C12, exp004, g10, 30pmol ssODN10, clone C2	97.7	15,7% -20 nt; 63,8% -12 nt; 14,8% -5 nt																															15.7								63.8							14.8
C2-004-g10L-C3	C2C12, exp004, g10, 30pmol ssODN10, clone C3	81.7	36,6% -5 nt; 35,3% -2 nt																																														36.6
C2-004-g10L-C4	C2C12, exp004, g10, 30pmol ssODN10, clone C4	94.9	30,6% -5 nt; 33,4% -2 nt; 30,8% -1 nt																																														30.6
C2-004-g10L-C5	C2C12, exp004, g10, 30pmol ssODN10, clone C5	95.8	31,8% -5 nt; 33,7% -2 nt; 30,3% -1 nt																																														31.8
C2-004-g10L-D1	C2C12, exp004, g10, 30pmol ssODN10, clone D1	96.6	49,1% -2 nt; 46,4% -1 nt
C2-004-g10L-D2	C2C12, exp004, g10, 30pmol ssODN10, clone D2	94.6	48,4% -10 nt; 44,3% -1 nt																																									48.4
C2-004-g10L-D3	C2C12, exp004, g10, 30pmol ssODN10, clone D3	67.7	35,8% -3 nt
C2-004-g10L-D4	C2C12, exp004, g10, 30pmol ssODN10, clone D4	95.8	54,5% -20 nt; 39,6% -4 nt																															54.5
C2-004-g10L-D5	C2C12, exp004, g10, 30pmol ssODN10, clone D5	64.5	32,3% -3 nt
C2-004-g10H-A1	C2C12, exp004, g10, 300pmol ssODN10, clone A1	96.8	48,1% -4 nt; 48,3% -1 nt
C2-004-g10H-A2	C2C12, exp004, g10, 300pmol ssODN10, clone A2	95.7	45,4% -4 nt; 47,3% -1 nt
C2-004-g10H-A3	C2C12, exp004, g10, 300pmol ssODN10, clone A3	91.8	71,2% -1 nt
C2-004-g10H-A4	C2C12, exp004, g10, 300pmol ssODN10, clone A4
C2-004-g10H-A5	C2C12, exp004, g10, 300pmol ssODN10, clone A5	94.2	46,3% -4 nt; 46,7% -1 nt
C2-004-g10H-A6	C2C12, exp004, g10, 300pmol ssODN10, clone A6	93	45,2% -4 nt; 46,3% -1 nt
C2-004-g10H-B1	C2C12, exp004, g10, 300pmol ssODN10, clone B1	90	43,8% -4 nt; 44,1% -1 nt
C2-004-g10H-B2	C2C12, exp004, g10, 300pmol ssODN10, clone B2	85.6	21,6% -4 nt; 20,8% -3 nt; 20,6% -2 nt; 22,5% -1 nt
C2-004-g10H-B3	C2C12, exp004, g10, 300pmol ssODN10, clone B3	89.8	29,5% -5 nt; 58,4% -2 nt																																														29.5
C2-004-g10H-B4	C2C12, exp004, g10, 300pmol ssODN10, clone B4	85.7	27,4% -3 nt; 56,3% -1 nt
C2-004-g10H-B5	C2C12, exp004, g10, 300pmol ssODN10, clone B5	90.5	8,8% -4 nt; 19,8% -3 nt; 58,5% -1 nt
C2-004-g10H-C1	C2C12, exp004, g10, 300pmol ssODN10, clone C1
C2-004-g10H-C2	C2C12, exp004, g10, 300pmol ssODN10, clone C2	87.4	42,0% -4 nt; 41,9% -1 nt
C2-004-g10H-C3	C2C12, exp004, g10, 300pmol ssODN10, clone C3	87.8	44,4% -2 nt; 41,0% -1 nt
C2-004-g10H-C4	C2C12, exp004, g10, 300pmol ssODN10, clone C4
C2-004-g10H-C5	C2C12, exp004, g10, 300pmol ssODN10, clone C5
C2-004-g10H-C6	C2C12, exp004, g10, 300pmol ssODN10, clone C6	96.7	48,5% -4 nt; 48,1% -1 nt
C2-004-g10H-D1	C2C12, exp004, g10, 300pmol ssODN10, clone D1	98.7	49,0% -2 nt; 48,4% -1 nt
C2-004-g10H-D2	C2C12, exp004, g10, 300pmol ssODN10, clone D2
C2-004-g10H-D3	C2C12, exp004, g10, 300pmol ssODN10, clone D3	90.1	28,5% -4 nt; 44,9% -1 nt
C2-004-g10H-D4	C2C12, exp004, g10, 300pmol ssODN10, clone D4	95.8	47,8% -4 nt; 47,4% -1 nt
C2-004-g10H-D5	C2C12, exp004, g10, 300pmol ssODN10, clone D5	95	44,3% -4 nt; 48,2% -1 nt
C2-004-g10H-D6	C2C12, exp004, g10, 300pmol ssODN10, clone D6	87.9	26,3% -3 nt; 39,7% -2 nt; 8,9% +16 nt
C2-004-g11L-A1	C2C12, exp004, g11, 30pmol ssODN11, clone A1	89.2	31,2% -8 nt; 28,8% -6 nt; 29,2% -2 nt																																											31.2		28.8
C2-004-g11L-A2	C2C12, exp004, g11, 30pmol ssODN11, clone A2	92.4	48,9% -6 nt; 38,9% +1 nt																																													48.9
C2-004-g11L-A3	C2C12, exp004, g11, 30pmol ssODN11, clone A3	93.4	29,5% -45 nt; 28,2% -4 nt; 29,9% -2 nt						29.5
C2-004-g11L-A4	C2C12, exp004, g11, 30pmol ssODN11, clone A4	84.8	29,1% -8 nt; 28,8% -6 nt; 26,4% -2 nt																																											29.1		28.8
C2-004-g11L-A5	C2C12, exp004, g11, 30pmol ssODN11, clone A5	93.2	26,4% -11 nt; 61,1% -4 nt																																								26.4
C2-004-g11L-B1	C2C12, exp004, g11, 30pmol ssODN11, clone B1	85.5	32,3% -45 nt; 27,0% -4 nt; 23,3% -2 nt						32.3
C2-004-g11L-B2	C2C12, exp004, g11, 30pmol ssODN11, clone B2	22	5,2% -45 nt; 5,3% -4 nt; 6,5% -2 nt; 71,5% 0 nt						5.2
C2-004-g11L-B3	C2C12, exp004, g11, 30pmol ssODN11, clone B3	86.5	29,9% -9 nt; 27,3% -3 nt; 26,85% -1 nt																																										29.9
C2-004-g11L-B4	C2C12, exp004, g11, 30pmol ssODN11, clone B4	93.4	43,8% -14 nt; 46,3% +1 nt																																					43.8
C2-004-g11L-B5	C2C12, exp004, g11, 30pmol ssODN11, clone B5	88.5	31,7% -10 nt; 29,5% -6 nt; 27,2% -2 nt																																									31.7				29.5
C2-004-g11L-B6	C2C12, exp004, g11, 30pmol ssODN11, clone B6	86.8	28,4% -19 nt; 26,8% -3 nt; 26,3% -1 nt																																28.4
C2-004-g11L-C2	C2C12, exp004, g11, 30pmol ssODN11, clone C2	85.7	42,5% -6 nt; 37,8% +1 nt																																													42.5
C2-004-g11L-C3	C2C12, exp004, g11, 30pmol ssODN11, clone C3	99	32,4% -11 nt; 65,8% -4 nt																																								32.4
C2-004-g11L-C4	C2C12, exp004, g11, 30pmol ssODN11, clone C4	97.6	48,7% -2 nt; 48,1% -1 nt
C2-004-g11L-C5	C2C12, exp004, g11, 30pmol ssODN11, clone C5	97.7	31,3% -16 nt; 33,5% -3 nt; 32,4% -2 nt																																			31.3
C2-004-g11L-C6	C2C12, exp004, g11, 30pmol ssODN11, clone C6	95.8	49,2% -6 nt; 45,1% +1 nt																																													49.2
C2-004-g11L-D1	C2C12, exp004, g11, 30pmol ssODN11, clone D1	97.6	47,2% -3 nt; 50,2% -1 nt
C2-004-g11L-D2	C2C12, exp004, g11, 30pmol ssODN11, clone D2	96.4	46,0% -3 nt; 49,5% -1 nt
C2-004-g11L-D3	C2C12, exp004, g11, 30pmol ssODN11, clone D3	93.4	85,7% -14 nt																																					85.7
C2-004-g11L-D4	C2C12, exp004, g11, 30pmol ssODN11, clone D4	97	48,7% -12 nt; 45,65% +1 nt																																							48.7
C2-004-g11L-D5	C2C12, exp004, g11, 30pmol ssODN11, clone D5	88	34,4% -2 nt; 38,0% -1 nt
C2-004-g11L-D6	C2C12, exp004, g11, 30pmol ssODN11, clone D6	97.6	30,2% -11 nt; 65,7% -4 nt																																								30.2
C2-004-g11H-A1	C2C12, exp004, g11, 300pmol ssODN11, clone A1	87	27,6% -19 nt; 3,4% -11 nt; 8,3% -4 nt; 24,5% -3 nt; 21,6% -1 nt																																27.6								3.4
C2-004-g11H-A2	C2C12, exp004, g11, 300pmol ssODN11, clone A2	96.7	28,2% -6 nt; 66,5% +1 nt																																													28.2
C2-004-g11H-A3	C2C12, exp004, g11, 300pmol ssODN11, clone A3	84.7	25,4% -8 nt; 25,6% -2 nt; 25,2% -1 nt																																											25.4
C2-004-g11H-A4	C2C12, exp004, g11, 300pmol ssODN11, clone A4	95.5	49,3% -9 nt; 45,4 -6 nt																																										49.3			45.4
C2-004-g11H-A5	C2C12, exp004, g11, 300pmol ssODN11, clone A5	95.5	24,3% -24 nt; 25,7% -9 nt; 22,8% -6 nt; 22,6% -2 nt																											24.3															25.7			22.8
C2-004-g11H-A6	C2C12, exp004, g11, 300pmol ssODN11, clone A6	96.5	28,3% -6 nt; 66,1% +1 nt																																													28.3
C2-004-g11H-B1	C2C12, exp004, g11, 300pmol ssODN11, clone B1	97.1	63,8% -6 nt; 30,8% -3 nt																																													63.8
C2-004-g11H-B2	C2C12, exp004, g11, 300pmol ssODN11, clone B2	11.4	85,2% 0
C2-004-g11H-B3	C2C12, exp004, g11, 300pmol ssODN11, clone B3
C2-004-g11H-B4	C2C12, exp004, g11, 300pmol ssODN11, clone B4
C2-004-g11H-B5	C2C12, exp004, g11, 300pmol ssODN11, clone B5	97.3	44,8% -42 nt; 43,4% -34 nt; 3,6% -8 nt; 3,7% -5 nt									44.8								43.4																										3.6			3.7
C2-004-g11H-B6	C2C12, exp004, g11, 300pmol ssODN11, clone B6	93.2	10,2% -42 nt; 10,4% -34 nt; 24,9% -6 nt; 23,9% -3 nt; 23,3% -1 nt									10.2								10.4																												24.9
C2-004-g11H-C1	C2C12, exp004, g11, 300pmol ssODN11, clone C1	92.6	24,8% -6 nt; 49,7% -3 nt; 6,4% -1 nt																																													24.8
C2-004-g11H-C2	C2C12, exp004, g11, 300pmol ssODN11, clone C2	98.9	96,6% -2 nt
C2-004-g11H-C4	C2C12, exp004, g11, 300pmol ssODN11, clone C4	92.6	54,3% -3 nt; 25,6% -2 nt
C2-004-g11H-C5	C2C12, exp004, g11, 300pmol ssODN11, clone C5	98.5	31,1% -6 nt; 66,9% +1 nt																																													31.1
C2-004-g11H-C6	C2C12, exp004, g11, 300pmol ssODN11, clone C6	99.1	31,8% -3 nt; 66,2% -1 nt
C2-004-g11H-D1	C2C12, exp004, g11, 300pmol ssODN11, clone D1	98.9	32,5% -2 nt; 65,0% -1%
C2-004-g11H-D2	C2C12, exp004, g11, 300pmol ssODN11, clone D2	96.3	35,0% -45 nt; 32,0% -6 nt; 29,2% -1 nt						35																																							32
C2-004-g11H-D3	C2C12, exp004, g11, 300pmol ssODN11, clone D3	98.6	49,9% -8 nt; 47,35 -1 nt																																											49.9
C2-004-g11H-D4	C2C12, exp004, g11, 300pmol ssODN11, clone D4	98.6	3,5% -19 nt; 3,3% -3 nt; 28,4% -2 nt; 63,2% -1 nt																																3.5
C2-004-g11H-D5	C2C12, exp004, g11, 300pmol ssODN11, clone D5	97.6	30,85 -3 nt; 63,5% -1 nt
C2-004-g11H-D6	C2C12, exp004, g11, 300pmol ssODN11, clone D6	65.2	31,3% -2 nt; 30,9% 0 nt; 31,9% +1 nt
C2-004-g12L-A1	C2C12, exp004, g12, 30pmol ssODN12, clone A1	97.5	45,3% +1 nt; 50,2% +2 nt
C2-004-g12L-A2	C2C12, exp004, g12, 30pmol ssODN12, clone A2	3.8	95,3% 0
C2-004-g12L-A3	C2C12, exp004, g12, 30pmol ssODN12, clone A3	6	93,0% 0
C2-004-g12L-A4	C2C12, exp004, g12, 30pmol ssODN12, clone A4	96.3	28,6% -4 nt; 69,7% -1 nt
C2-004-g12L-A5	C2C12, exp004, g12, 30pmol ssODN12, clone A5	98.4	32,6% -2 nt; 63,2% -1 nt
C2-004-g12L-A6	C2C12, exp004, g12, 30pmol ssODN12, clone A6	98.9	9,2% -2 nt; 86,7% -1 nt
C2-004-g12L-B1	C2C12, exp004, g12, 30pmol ssODN12, clone B1	97.4	45,8% -7 nt; 48,3% -1 nt																																												45.8
C2-004-g12L-B2	C2C12, exp004, g12, 30pmol ssODN12, clone B2	96.5	33,6% -2 nt; 33,0% -1 nt; 29,9% +1 nt
C2-004-g12L-B3	C2C12, exp004, g12, 30pmol ssODN12, clone B3	91.8	32,5% -2 nt; 30,3% -1 nt; 28,55 +1 nt
C2-004-g12L-B4	C2C12, exp004, g12, 30pmol ssODN12, clone B4	66.8	33,6% -8 nt; 33,1% -1 nt; 31,5% 0 nt																																											33.6
C2-004-g12L-B5	C2C12, exp004, g12, 30pmol ssODN12, clone B5	98.6	94,6% -1 nt
C2-004-g12L-C1	C2C12, exp004, g12, 30pmol ssODN12, clone C1	98.6	30,7% -4 nt; 67,9% -1 nt
C2-004-g12L-C2	C2C12, exp004, g12, 30pmol ssODN12, clone C2	98.4	32,0% -5 nt; 66,3% -1 nt																																														32
C2-004-g12L-C3	C2C12, exp004, g12, 30pmol ssODN12, clone C3	99.5	82,6% -1 nt; 16,1% 0 nt
C2-004-g12L-C4	C2C12, exp004, g12, 30pmol ssODN12, clone C4
C2-004-g12L-C5	C2C12, exp004, g12, 30pmol ssODN12, clone C5	99.4	96,2% -1 nt
C2-004-g12L-C6	C2C12, exp004, g12, 30pmol ssODN12, clone C6	99.5	96,5% -1 nt
C2-004-g12L-D1	C2C12, exp004, g12, 30pmol ssODN12, clone D1	97.7	49,5% -15 nt; 45,4% -1 nt																																				49.5
C2-004-g12L-D2	C2C12, exp004, g12, 30pmol ssODN12, clone D2	98.3	30,6% -2 nt; 64,1% -1 nt
C2-004-g12L-D3	C2C12, exp004, g12, 30pmol ssODN12, clone D3	99.1	96,0% -1 nt
C2-004-g12L-D4	C2C12, exp004, g12, 30pmol ssODN12, clone D4	99.2	97,0% -1 nt
C2-004-g12L-D5	C2C12, exp004, g12, 30pmol ssODN12, clone D5	98.9	96,5% -1 nt
C2-004-g12L-D6	C2C12, exp004, g12, 30pmol ssODN12, clone D6	85.3	26,2% -2 nt; 56,6% -1 nt; 13,1% 0
C2-004-g12H-A3	C2C12, exp004, g12, 300pmol ssODN12, clone A3	95.2	64,5% -1 nt; 29,5% +1 nt
C2-004-g12H-A6	C2C12, exp004, g12, 300pmol ssODN12, clone A6	98.9	68,5% -1 nt; 30,4% +1 nt
C2-004-g12H-B1	C2C12, exp004, g12, 300pmol ssODN12, clone B1	98.9	32,9% -1 nt; 64,1% +1
C2-004-g12H-B2	C2C12, exp004, g12, 300pmol ssODN12, clone B2	99.2	95,2% -1 nt
C2-004-g12H-B3	C2C12, exp004, g12, 300pmol ssODN12, clone B3	97.1	89,7% -1 nt
C2-004-g12H-B4	C2C12, exp004, g12, 300pmol ssODN12, clone B4	6.3	91,7% 0 nt
C2-004-g12H-B6	C2C12, exp004, g12, 300pmol ssODN12, clone B6	5.7	92,8% 0 nt
C2-004-g12H-C1	C2C12, exp004, g12, 300pmol ssODN12, clone C1	97	63,6% -1 nt; 29,9% +1 nt
C2-004-g12H-C2	C2C12, exp004, g12, 300pmol ssODN12, clone C2	97.3	63,4% -1 nt; 31,1% +1 nt
C2-004-g12H-C3	C2C12, exp004, g12, 300pmol ssODN12, clone C3	97.5	30,4% -2 nt; 61,8% -1 nt
C2-004-g12H-C4	C2C12, exp004, g12, 300pmol ssODN12, clone C4	41.1	35,1% -1 nt; 56,1% 0 nt
C2-004-g12H-C5	C2C12, exp004, g12, 300pmol ssODN12, clone C5	97.6	91,1% -1 nt
C2-004-g12H-C6	C2C12, exp004, g12, 300pmol ssODN12, clone C6	94.9	79,7% +1 nt
C2-004-g12H-D1	C2C12, exp004, g12, 300pmol ssODN12, clone D1	6	92,0% 0 nt
C2-004-g12H-D2	C2C12, exp004, g12, 300pmol ssODN12, clone D2	95.7	64,0% -1 nt; 27,9% +1 nt
C2-004-g12H-D3	C2C12, exp004, g12, 300pmol ssODN12, clone D3	97.1	64,6% -1 nt; 28,8% +1 nt
C2-004-g12H-D4	C2C12, exp004, g12, 300pmol ssODN12, clone D4	98.4	92,1% -1 nt
C2-004-g12H-D5	C2C12, exp004, g12, 300pmol ssODN12, clone D5	96.5	64,0% -1 nt; 27,9% +1 nt
C2-005-g10Lm-1	C2C12, exp005, g10, 30pmol ssODN10, PAM mutated, clone 1	60.2	8,5% -5 nt; 34,8% -2 nt; 16,9% -1 nt; 34,5% 0																																														8.5
C2-005-g10Lm-2	C2C12, exp005, g10, 30pmol ssODN10, PAM mutated, clone 2	98.8	90,1% -5 nt																																														90.1
C2-005-g10Lm-3	C2C12, exp005, g10, 30pmol ssODN10, PAM mutated, clone 3	97.2	32,9% -3 nt; 31,7% -2 nt; 32,7% -1 nt
C2-005-g10Lm-4	C2C12, exp005, g10, 30pmol ssODN10, PAM mutated, clone 4	98.6	48,9% -4 nt; 49,7% -1 nt
C2-005-g10Lm-5	C2C12, exp005, g10, 30pmol ssODN10, PAM mutated, clone 5	98.4	45,3% -2 nt; 51,0% -1 nt
C2-005-g10Lm2-1	C2C12, exp005, g10, 30pmol ssODN10, PAM+guide mutated, clone 1	99.4	96,6% -4 nt
C2-005-g10Lm2-2	C2C12, exp005, g10, 30pmol ssODN10, PAM+guide mutated, clone 2	97.4	33,9% -6 nt; 32,2% -2 nt; 31,3% -1 nt																																													33.9
C2-005-g10Lm2-3	C2C12, exp005, g10, 30pmol ssODN10, PAM+guide mutated, clone 3	98.8	77,2% -1 nt; 20,5% +1 nt
C2-005-g10Lm2-4	C2C12, exp005, g10, 30pmol ssODN10, PAM+guide mutated, clone 4	99.4	97,1% -2 nt
C2-005-g10Lm2-5	C2C12, exp005, g10, 30pmol ssODN10, PAM+guide mutated, clone 5	97.3	31,0% -28 nt; 64,9% -5 nt																							31																							64.9
C2-005-g10Lm2-6	C2C12, exp005, g10, 30pmol ssODN10, PAM+guide mutated, clone 6	97.8	32,9% -24 nt; 63,3% +1 nt																											32.9
C2-005-g10Hm-1	C2C12, exp005, g10, 300pmol ssODN10, PAM mutated, clone 1	97.5	33,9% -18 nt; 33,2% -4 nt; 30,0% -1 nt																																	33.9
C2-005-g10Hm-2	C2C12, exp005, g10, 300pmol ssODN10, PAM mutated, clone 2	98.8	50,1% -1 nt; 48,7% +1 nt
C2-005-g10Hm-3	C2C12, exp005, g10, 300pmol ssODN10, PAM mutated, clone 3	98.9	49,4% -1 nt; 49,3% +1 nt
C2-005-g10Hm-4	C2C12, exp005, g10, 300pmol ssODN10, PAM mutated, clone 4	97.5	23,5% -2 nt; 49,9% -1 nt; 24,1% +1 nt
C2-005-g10Hm-5	C2C12, exp005, g10, 300pmol ssODN10, PAM mutated, clone 5	70	42,8% -42 nt; 24,6% -10 nt; 22,7% 0 nt									42.8																																24.6
C2-005-g10Hm-6	C2C12, exp005, g10, 300pmol ssODN10, PAM mutated, clone 6	97.9	33,8% -5 nt; 32,9% -4 nt; 31,1% -1 nt																																														33.8
C2-005-g10Hm-7	C2C12, exp005, g10, 300pmol ssODN10, PAM mutated, clone 7	98.1	32,7% -5 nt; 33,0% -4 nt; 32,4% -1 nt																																														32.7
C2-005-g10Hm-8	C2C12, exp005, g10, 300pmol ssODN10, PAM mutated, clone 8	97.1	34,8% -18 nt; 31,9% -4 nt; 30,0% -1 nt																																	34.8
C2-005-g10Hm-9	C2C12, exp005, g10, 300pmol ssODN10, PAM mutated, clone 9	98.3	51,7% -3 nt; 46,5% +1 nt
C2-005-g10Hm-10	C2C12, exp005, g10, 300pmol ssODN10, PAM mutated, clone 10	97.5	33,3% -3 nt; 32,8% -2 nt; 31,4% -1 nt
C2-005-g10Hm-11	C2C12, exp005, g10, 300pmol ssODN10, PAM mutated, clone 11	97.8	35,1% -3 nt; 32,6% -2 nt; 30,1% -1 nt
C2-005-g10Hm2-1	C2C12, exp005, g10, 300pmol ssODN10, PAM+guide mutated, clone 1	97.6	32,7% -4 nt; 33,8% -1 nt; 31,1% +1 nt
C2-005-g10Hm2-2	C2C12, exp005, g10, 300pmol ssODN10, PAM+guide mutated, clone 2	86.5	27,4% -3 nt; 27,6% -1 nt; 27,8% +1 nt
C2-005-g10Hm2-3	C2C12, exp005, g10, 300pmol ssODN10, PAM+guide mutated, clone 3	96.5	51,5% -21 nt; 42,4% -1 nt																														51.5
C2-005-g10Hm2-4	C2C12, exp005, g10, 300pmol ssODN10, PAM+guide mutated, clone 4	96.7	52,7% -21 nt; 43,2% -1 nt																														52.7
C2-005-g10Hm2-5	C2C12, exp005, g10, 300pmol ssODN10, PAM+guide mutated, clone 5	99	94,0% -4 nt
C2-005-g10Hm2-6	C2C12, exp005, g10, 300pmol ssODN10, PAM+guide mutated, clone 6	97.5	30,5% -4 nt; 64,6% -3 nt
C2-005-g10Hm2-7	C2C12, exp005, g10, 300pmol ssODN10, PAM+guide mutated, clone 7	83.6	58,6% -2 nt
C2-005-g10Hm2-8	C2C12, exp005, g10, 300pmol ssODN10, PAM+guide mutated, clone 8	92.3	81,1% -1 nt
C2-005-g11Lm-1	C2C12, exp005, g11, 30pmol ssODN11, PAM mutated, clone 1	95.6	31,3% -6 nt; 33,2% -4 nt; 29,9% -1 nt																																													31.3
C2-005-g11Lm-2	C2C12, exp005, g11, 30pmol ssODN11, PAM mutated, clone 2	98.5	74,1% -2 nt; 23,0% -1 nt
C2-005-g11Lm-3	C2C12, exp005, g11, 30pmol ssODN11, PAM mutated, clone 3	97.9	34,2% -19 nt; 32,7% -3 nt; 30,2% -2 nt																																34.2
C2-005-g11Lm-4	C2C12, exp005, g11, 30pmol ssODN11, PAM mutated, clone 4	96.7	32,3% -6 nt; 32,9% -2 nt; 31,5% -1 nt																																													32.3
C2-005-g11Lm-5	C2C12, exp005, g11, 30pmol ssODN11, PAM mutated, clone 5	97	48,5% -2 nt; 48,5% +1 nt
C2-005-g11Lm-6	C2C12, exp005, g11, 30pmol ssODN11, PAM mutated, clone 6	95.4	51,1% -2 nt; 44,3% +1 nt
C2-005-g11Lm-7	C2C12, exp005, g11, 30pmol ssODN11, PAM mutated, clone 7	96	50,8% -14 nt; 46,0% -6 nt																																					50.8								46
C2-005-g11Lm-8	C2C12, exp005, g11, 30pmol ssODN11, PAM mutated, clone 8	98.1	31,5% -14 nt; 64,6% -6 nt																																					31.5								64.6
C2-005-g11Lm2-1	C2C12, exp005, g11, 30pmol ssODN11, PAM+guide mutated, clone 1	96.3	31,4% -7 nt; 33,4% -4 nt; 31,5% -2 nt																																												31.4
C2-005-g11Lm2-2	C2C12, exp005, g11, 30pmol ssODN11, PAM+guide mutated, clone 2	51.7	50,4% -11 nt; 47,1% 0 nt																																								50.4
C2-005-g11Lm2-3	C2C12, exp005, g11, 30pmol ssODN11, PAM+guide mutated, clone 3	95.7	2,6% -7 nt; 7,2% -6 nt; 47,2% -4 nt; 38,6% +1 nt																																												2.6	7.2
C2-005-g11Hm-1	C2C12, exp005, g11, 300pmol ssODN11, PAM mutated, clone 1	27.8	13,1% -6 nt																																													13.1
C2-005-g11Hm-2	C2C12, exp005, g11, 300pmol ssODN11, PAM mutated, clone 2	99	49,9% -47 nt; 47,9% -6 nt				49.9																																									47.9
C2-005-g11Hm-3	C2C12, exp005, g11, 300pmol ssODN11, PAM mutated, clone 3	94.9	25,9% -44 nt; 25,2% -27 nt; 20,7% -3 nt; 22,0% +1 nt							25.9																	25.2
C2-005-g11Hm-4	C2C12, exp005, g11, 300pmol ssODN11, PAM mutated, clone 4	98.4	92,4% -6 nt																																													92.4
C2-005-g11Hm-5	C2C12, exp005, g11, 300pmol ssODN11, PAM mutated, clone 5	99.3	97,4% -1 nt
C2-005-g11Hm-6	C2C12, exp005, g11, 300pmol ssODN11, PAM mutated, clone 6	99.3	96,1% -1 nt
C2-005-g11Hm-7	C2C12, exp005, g11, 300pmol ssODN11, PAM mutated, clone 7	99	96,4% -6 nt																																													96.4
C2-005-g11Hm-8	C2C12, exp005, g11, 300pmol ssODN11, PAM mutated, clone 8
C2-005-g11Hm-9	C2C12, exp005, g11, 300pmol ssODN11, PAM mutated, clone 9	93.9	26,0% -30 nt; 36,4% -1 nt; 31,1% +2 nt																					26
C2-005-g11Hm-10	C2C12, exp005, g11, 300pmol ssODN11, PAM mutated, clone 10	99	66,9% -6 nt; 30,7% -4 nt																																													66.9
C2-005-g11Hm2-1	C2C12, exp005, g11, 300pmol ssODN11, PAM+guide mutated, clone 1	98.3	92,3% -21 nt																														92.3
C2-005-g11Hm2-2	C2C12, exp005, g11, 300pmol ssODN11, PAM+guide mutated, clone 2	97.4	48,1% -2 nt; 47,1% -1 nt
C2-005-g11Hm2-3	C2C12, exp005, g11, 300pmol ssODN11, PAM+guide mutated, clone 3	99.2	94,2% -21 nt																														94.2
C2-005-g11Hm2-4	C2C12, exp005, g11, 300pmol ssODN11, PAM+guide mutated, clone 4	97.7	21,3% -41 nt; 50,8% -2 nt; 23,0% -1 nt										21.3
C2-005-g11Hm2-5	C2C12, exp005, g11, 300pmol ssODN11, PAM+guide mutated, clone 5	97.1	20,8% -41 nt; 51,2% -2 nt; 22,9% -1 nt										20.8
C2-005-g11Hm2-6	C2C12, exp005, g11, 300pmol ssODN11, PAM+guide mutated, clone 6	98.8	93,8% -1 nt
C2-005-g11Hm2-7	C2C12, exp005, g11, 300pmol ssODN11, PAM+guide mutated, clone 7	98	32,4% -8 nt; 65,4% -1 nt																																											32.4
C2-005-g11Hm2-8	C2C12, exp005, g11, 300pmol ssODN11, PAM+guide mutated, clone 8	98.2	33,3% -6 nt; 64,8% -2 nt																																													33.3
C2-005-g11Hm2-9	C2C12, exp005, g11, 300pmol ssODN11, PAM+guide mutated, clone 9	99	96,3% -1 nt
C2-005-g11Hm2-10	C2C12, exp005, g11, 300pmol ssODN11, PAM+guide mutated, clone 10	99	96,8% -21 nt																														96.8
C2-005-g11Hm2-11	C2C12, exp005, g11, 300pmol ssODN11, PAM+guide mutated, clone 11	97.8	48,2% -2 nt; 5,4% -1 nt; 44,2% +1 nt
C2-005-g11Hm2-12	C2C12, exp005, g11, 300pmol ssODN11, PAM+guide mutated, clone 12	96.3	31,4% -4 nt; 34,5% -1 nt; 30,3% +1 nt
C2-005-g12Lm-1	C2C12, exp005, g12, 30pmol ssODN12, PAM mutated, clone 1	99.3	94,8% -1 nt
C2-005-g12Lm-2	C2C12, exp005, g12, 30pmol ssODN12, PAM mutated, clone 2	97.9	34,0% -9 nt; 33,5% -2 nt; 30,0% +1 nt																																										34
C2-005-g12Lm-3	C2C12, exp005, g12, 30pmol ssODN12, PAM mutated, clone 3	99	92,7% -1 nt
C2-005-g12Lm-4	C2C12, exp005, g12, 30pmol ssODN12, PAM mutated, clone 4	89.1	19,3% -27 nt; 23,4% -8 nt; 23,7% -3 nt; 21,3% +1 nt																								19.3																			23.4
C2-005-g12Lm-5	C2C12, exp005, g12, 30pmol ssODN12, PAM mutated, clone 5	98	52,1% -15 nt; 43,5% -1 nt																																				52.1
C2-005-g12Lm2-1	C2C12, exp005, g12, 30pmol ssODN12, PAM+guide mutated, clone 1	90.7	45,2% -32 nt; 41,6% -1 nt																			45.2
C2-005-g12Lm2-2	C2C12, exp005, g12, 30pmol ssODN12, PAM+guide mutated, clone 2	98.6	21,6% -6 nt; 74,2% -1 nt																																													21.6
C2-005-g12Lm2-3	C2C12, exp005, g12, 30pmol ssODN12, PAM+guide mutated, clone 3	50.7	50,3% -3 nt; 47,8% 0 nt
C2-005-g12Lm2-4	C2C12, exp005, g12, 30pmol ssODN12, PAM+guide mutated, clone 4	99	91,7% -1 nt
C2-005-g12Lm2-5	C2C12, exp005, g12, 30pmol ssODN12, PAM+guide mutated, clone 5	99.2	96,2% -1 nt
C2-005-g12Lm2-6	C2C12, exp005, g12, 30pmol ssODN12, PAM+guide mutated, clone 6	98.8	65,7% -2 nt; 29,8% -1 nt
C2-005-g12Lm2-7	C2C12, exp005, g12, 30pmol ssODN12, PAM+guide mutated, clone 7	92	46,8% -34 nt; 41,4% -1 nt																	46.8
C2-005-g12Lm2-8	C2C12, exp005, g12, 30pmol ssODN12, PAM+guide mutated, clone 8	99.3	96,9% -1 nt
C2-005-g12Hm-1	C2C12, exp005, g12, 300pmol ssODN12, PAM mutated, clone 1	95.7	27,2% -2 nt; 64,9% -1 nt
C2-005-g12Hm-2	C2C12, exp005, g12, 300pmol ssODN12, PAM mutated, clone 2	89.9	76,6% -1 nt
C2-005-g12Hm-3	C2C12, exp005, g12, 300pmol ssODN12, PAM mutated, clone 3	66.6	64,7% -1 nt; 31,7% 0 nt
C2-005-g12Hm-4	C2C12, exp005, g12, 300pmol ssODN12, PAM mutated, clone 4	96.7	80,9% -1 nt
C2-005-g12Hm-5	C2C12, exp005, g12, 300pmol ssODN12, PAM mutated, clone 5	95.9	87,5% -1 nt
C2-005-g12Hm-6	C2C12, exp005, g12, 300pmol ssODN12, PAM mutated, clone 6	98.4	93,3% -45 nt						93.3
C2-005-g12Hm2-1	C2C12, exp005, g12, 300pmol ssODN12, PAM+guide mutated, clone 1	3.1	95,3% 0 nt
C2-005-g12Hm2-2	C2C12, exp005, g12, 300pmol ssODN12, PAM+guide mutated, clone 2	2.3	97,1% 0 nt
C2-005-g12Hm2-3	C2C12, exp005, g12, 300pmol ssODN12, PAM+guide mutated, clone 3	99.2	96,7% -1 nt
C2-005-g12Hm2-4	C2C12, exp005, g12, 300pmol ssODN12, PAM+guide mutated, clone 4	2.7	96,8% 0 nt
C2-005-g12Hm2-5	C2C12, exp005, g12, 300pmol ssODN12, PAM+guide mutated, clone 5	2.2	97,5% 0 nt
			sg10	0	0	0	0	0	0	0	0	1	0	0	0	0	0	0	0	0	0	0	0	0	0	0	0	0	0	1	0	0	3	4	0	2	0	0	0	0	0	3	0	2	0	1	1	2	14
			sg11	0	0	0	1	0	4	1	0	2	2	0	0	0	0	0	0	2	0	0	0	1	0	0	1	0	0	1	0	0	3	0	4	0	0	1	0	4	0	1	5	1	3	6	2	26	1
			sg12	0	0	0	0	0	1	0	0	0	0	0	0	0	0	0	0	1	0	1	0	0	0	1	1	0	0	0	0	0	0	0	0	0	0	0	2	0	0	0	0	0	1	2	1	1	1
			Clones with triplete deletions/insertions (out of total:210 clones)			0			5			3			0			0			0			1			2			2			6			2			2			4			4			29
			Clones with triplete deletions/insertions (sg10:70 clones)			0			0			1			0			0			0			0			0			1			3			2			0			3			0			2
			Clones with triplete deletions/insertions (sg11: 76 clones)			0			4			2			0			0			0			1			1			1			3			0			0			1			3			26
			Clones triplete deletions/insertions (sg12: 64 clones)			0			1			0			0			0			0			0			1			0			0			0			2			0			1			1
			Clones with alleles with no changes (out of total: 210 clones)
			Clones with alleles with no changes (sg10: 70 clones)
			Clones with alleles with no changes (sg11: 76 clones)
			Clones with alleles with no changes (sg12: 64 clones)
			Clones with alleles withother indels (out of total: 210 clones)	0	0		1	0		1	0		2	0		0	0		0	3		1	0		0	1		0	0		0	0		4	4		0	1		4	0		5	3		9	4		16
			Clones with alleles with other indels (sg10: 70 clones)	0	0		0	0		0	0		0	0		0	0		0	0		0	0		0	0		0	0		0	0		4	0		0	0		0	0		0	2		1	1		14
			Clones with alleles with other indels (sg11: 76 clones)	0	0		1	0		1	0		2	0		0	0		0	2		0	0		0	0		0	0		0	0		0	4		0	1		4	0		5	1		6	2		1
			Clones with alleles with othe rindels (sg12: 64 clones)	0	0		0	0		0	0		0	0		0	0		0	1		1	0		0	1		0	0		0	0		0	0		0	0		0	0		0	0		2	1		1
			Information about 210 clones (70 of sg10, 76 of sg11 and 64 of sg12)
			sg10 (70 clones)	0	0	0	0	0	0	0	0	1.42857	0	0	0	0	0	0	0	0	0	0	0	0	0	0	0	0	0	1.42857	0	0	4.28571	5.71429	0	2.85714	0	0	0	0	0	4.28571	0	2.85714	0	1.42857	1.42857	2.85714	20
			sg11 (76 clones)	0	0	0	1.33333	0	5.33333	1.33333	0	2.66667	2.66667	0	0	0	0	0	0	2.66667	0	0	0	1.33333	0	0	1.33333	0	0	1.33333	0	0	4	0	5.33333	0	0	1.33333	0	5.33333	0	1.33333	6.66667	1.33333	4	8	2.66667	34.6667	1.33333
			sg12 (64 clones)	0	0	0	0	0	1.5625	0	0	0	0	0	0	0	0	0	0	1.5625	0	1.5625	0	0	0	1.5625	1.5625	0	0	0	0	0	0	0	0	0	0	0	3.125	0	0	0	0	0	1.5625	3.125	1.5625	1.5625	1.5625
[truncated: 63 more columns]

## Sheet: Graphs of clones
TIDE analysis
